# Supplementary material
Source: publisher figshare collection journal article supplement (https://tandf.figshare.com/ndownloader/files/21652752)
Supplement: Supplementary file 1 [file 21652752]

*Appendix: Experimental Items***1. Prefixation set**

| <b>Unrelated Prime</b> | <b>English Translation</b> | <b>Derived Prime</b> | <b>English Translation</b> | <b>Inflected Prime</b> | <b>English Translation</b> | <b>Target</b> | <b>English Translation</b> |
|------------------------|----------------------------|----------------------|----------------------------|------------------------|----------------------------|---------------|----------------------------|
| kutlwano               | agreement                  | botsotsi             | trickery                   | ditotsi                | petty criminals            | TSOTSI        | petty criminal             |
| matlhare               | leaves                     | bonyatsi             | concubineship              | dinyatsi               | concubines                 | NYATSI        | concubine                  |
| legetla                | shoulder                   | bongaka              | medical degree             | dingaka                | doctors                    | NGAKA         | doctor                     |
| temogo                 | realization                | bonoga               | sneakiness                 | dinoga                 | snakes                     | NOGA          | snake                      |
| maitseboa              | evening                    | botshwene            | stupidity                  | ditshwene              | baboons                    | TSHWENE       | baboon                     |
| lonyatso               | contempt                   | botshipi             | hardness, hard-heartedness | ditshipi               | metals                     | TSHIPI        | metal                      |
| leseka                 | bracelet                   | bopodi               | goat-like behavior         | dipodi                 | goats                      | PODI          | goat                       |
| modumo                 | sound                      | bonku                | submissiveness             | dinku                  | sheep (plural)             | NKU           | sheep                      |
| selwana                | utensil                    | bontsa               | dog-like behavior          | dintsa                 | dogs                       | NTSA          | dog                        |
| foraga                 | bait                       | bokatse              | coolness                   | dikatse                | cats                       | KATSE         | cat                        |
| leroo                  | paw                        | bopelo               | kind heartedness           | dipelo                 | hearts                     | PELO          | heart                      |
| ntlole                 | spring hare                | bonako               | rapidity                   | dinako                 | times                      | NAKO          | time                       |
| sekgwama               | purse                      | boagente             | law                        | diagente               | lawyers                    | AGENTE        | lawyer                     |
| setshwakga             | lazy person                | bokaedi              | supervision                | dikaedi                | instructions               | KAEDI         | instruction                |
| motsoko                | tobacco                    | bontlha              | part                       | dintlha                | points                     | NTLHA         | point                      |
| sehuba                 | chest                      | bojelo               | manger                     | dijelo                 | crops                      | JELO          | crop                       |

| <b>Unrelated Prime</b> | <b>English Translation</b> | <b>Derived Prime</b> | <b>English Translation</b>           | <b>Inflected Prime</b> | <b>English Translation</b> | <b>Target</b> | <b>English Translation</b> |
|------------------------|----------------------------|----------------------|--------------------------------------|------------------------|----------------------------|---------------|----------------------------|
| ntlwana                | room                       | bokaelo              | meaning                              | dikaelo                | illustrations              | KAELO         | illustration               |
| lemphorwana            | squab bird                 | bopalamente          | parliamentary duties                 | dipalamente            | parliaments                | PALAMENTE     | parliament                 |
| mogatsaka              | my spouse                  | bokgeleke            | talent                               | dikgeleke              | experts                    | KGELEKE       | expert                     |
| lebogo                 | hand                       | bonaga               | undeveloped, wild behavior           | dinaga                 | forests                    | NAGA          | forest                     |
| mogotlha               | livestock track            | bongwetsi            | the state of being a daughter-in-law | dingwetsi              | daughters-in-law           | NGWETSI       | daughter-in-law            |
| moroba                 | fun                        | bokala               | disobedience , stubbornness          | dikala                 | branches                   | KALA          | branch                     |
| sefapaano              | cross                      | bophekgwe            | bully behavior                       | diphekgwe              | bullies                    | PHEKGWE       | bully                      |
| serurubele             | butterfly                  | botshimega           | state of championship                | ditshimega             | champions                  | TSHIMEGA      | champion                   |
| kgololo                | liberation                 | bokwete              | bossiness, pomp                      | dikwete                | braggarts                  | KWETE         | braggart                   |
| sekgono                | elbow                      | bokwana              | gentle / benevolent person, brisket  | dikwana                | lambs                      | KWANA         | lamb                       |
| pharologanyo           | difference                 | bochekwane           | state of being a naughty person      | dichekwane             | naughty persons            | CHEKWANE      | naughty person             |
| molwetsi               | patient                    | botshomi             | friendship                           | ditshomi               | pals                       | TSHOMI        | pal                        |

## 2. Suffixation set

| Unrelated Prime | English Translation | Derived Prime | English Translation     | Inflected Prime | English Translation | Target  | English Translation |
|-----------------|---------------------|---------------|-------------------------|-----------------|---------------------|---------|---------------------|
| thunya          | shoot               | rekega        | ability to be bought    | rekile          | bought              | REKA    | buy                 |
| latswa          | lick                | ratega        | loveable                | ratile          | loved               | RATA    | love                |
| goduma          | sip                 | supega        | proven                  | supile          | showed              | SUPA    | show                |
| relela          | slip                | rutega        | learn a lot             | rutile          | taught              | RUTA    | teach               |
| fefera          | sift                | robega        | collapse, break         | robile          | broke               | ROBA    | break               |
| setla           | pound               | agega         | buildable               | agile           | built               | AGA     | build               |
| huduga          | move house          | lomega        | biteable                | lomile          | bit                 | LOMA    | bite                |
| rapela          | pray, beg           | lebega        | appear, smart           | lebile          | looked              | LEBA    | look                |
| tuka            | burn                | kamega        | ability to be combed    | kamile          | combed              | KAMA    | comb                |
| gobetse         | hurt                | tlhophega     | choseable               | tlhophile       | selected            | TLHOPHA | select              |
| tsoga           | wake up             | rerega        | preachable              | rerile          | preached            | RERA    | preach              |
| potela          | shirk               | loega         | ability to be bewitched | loile           | bewitched           | LOA     | bewitch             |
| apola           | take off clothes    | romega        | ability to be sent      | romile          | sent                | ROMA    | send                |
| tabola          | scoop up            | segega        | cutable                 | segile          | cut                 | SEGA    | cut                 |
| bekenya         | flash               | senkega       | searchable              | senkile         | searched            | SENKA   | search              |

| <b>Unrelated Prime</b> | <b>English Translation</b> | <b>Derived Prime</b> | <b>English Translation</b>     | <b>Inflected Prime</b> | <b>English Translation</b> | <b>Target</b> | <b>English Translation</b> |
|------------------------|----------------------------|----------------------|--------------------------------|------------------------|----------------------------|---------------|----------------------------|
| romela                 | send                       | bopega               | ability to be molded           | bopile                 | molded                     | BOPA          | mold                       |
| tsadisa                | mate                       | bokega               | ability to be praised          | bokile                 | recited                    | BOKA          | recite                     |
| tlhodia                | make noise                 | batlega              | ability to be wanted / desired | batlile                | wanted                     | BATLA         | want                       |
| tlhagola               | dig up for seeds           | phuthega             | ability to be gathered         | phuthile               | gathered                   | PHUTHA        | gather                     |
| ratela                 | sneak upon                 | logega               | plaitable                      | logile                 | plaited                    | LOGA          | plait                      |
| timela                 | stray                      | lemega               | arable                         | lemile                 | cultivated                 | LEMA          | cultivate                  |
| olela                  | collect garbage            | kubega               | clearable                      | kubile                 | cleared                    | KUBA          | clear                      |
| kgatlha                | amuse                      | remega               | ability to be chopped          | remile                 | chopped                    | REMA          | chop                       |
| rotha                  | drop                       | epega                | digable                        | epile                  | dug                        | EPA           | dig                        |
| dikologa               | rotate                     | thubega              | dissolve                       | thubile                | broke                      | THUBA         | break                      |
| duduetsa               | ululate                    | tshubega             | combustible                    | tshubile               | burned                     | TSHUBA        | burn                       |
| boulela                | become jealous             | boifega              | feared, ability to be feared   | boifile                | feared                     | BOIFA         | fear                       |
| thakanya               | add, mix                   | ruega                | ability to be reared           | ruile                  | reared                     | RUA           | rear                       |

### 3. Orthographic control set

| Unrelated Prime             | English Translation                   | Related Prime | English Translation                  | Target | English Translation         |
|-----------------------------|---------------------------------------|---------------|--------------------------------------|--------|-----------------------------|
| <b>Word-Final Overlap</b>   |                                       |               |                                      |        |                             |
| tshetlha                    | brown                                 | kgaraga       | thick                                | RAGA   | kick                        |
| nnye                        | small                                 | kima          | fat                                  | IMA    | conceive                    |
| nyelela                     | disappear                             | gwaripa       | dirty, red and white (animal colour) | RIPA   | tear up, shred              |
| khibidu                     | red                                   | potlana       | small                                | TLANA  | climb                       |
| fudua                       | stir                                  | mosha         | new                                  | OSHA   | pause                       |
| sesane                      | thin                                  | putswa        | blue                                 | TSWA   | come out                    |
| goga                        | pull                                  | tuba          | fawn                                 | UBA    | throb                       |
| raela                       | tempt                                 | ribega        | turn upside-down                     | BEGA   | report                      |
| ramaga                      | red-and-white mottled (animal colour) | gadika        | fry                                  | DIKA   | gang up                     |
| koloba                      | get wet                               | dumela        | agree                                | MELA   | grow                        |
| felela                      | end, finish                           | sobotla       | march on sth                         | BOTLA  | burp                        |
| swapola                     | snatch                                | shenama       | grin                                 | NAMA   | sit with legs stretched out |
| tletse                      | full                                  | rakana        | meet                                 | KANA   | pack                        |
| phepha                      | clean                                 | kgora         | be full                              | ORA    | warm oneself at a fire      |
| tshabega                    | fiery                                 | laletsa       | invite                               | LE TSA | call                        |
| <b>Word-Initial Overlap</b> |                                       |               |                                      |        |                             |
| atamela                     | come closer                           | kgaogano      | divide                               | KGAOGA | break                       |
| tsoma                       | hunt                                  | lekana        | equal                                | LEKA   | try                         |
| alola                       | chase                                 | gakala        | worsen                               | GAKA   | baffle                      |
| tlwaela                     | disrespect                            | bolaya        | kill                                 | BOLA   | rot                         |

| <b>Unrelated Prime</b> | <b>English Translation</b>   | <b>Related Prime</b> | <b>English Translation</b> | <b>Target</b> | <b>English Translation</b> |
|------------------------|------------------------------|----------------------|----------------------------|---------------|----------------------------|
| somola                 | pull out                     | sikara               | carry on shoulder          | SIKA          | scout                      |
| dubega                 | kneadable                    | lelala               | look up                    | LELA          | cry                        |
| boela                  | return                       | ilela                | revere                     | ILE           | gone                       |
| masweu                 | white                        | elama                | incubate                   | ELA           | flow                       |
| hibidu                 | red                          | monate               | delicious                  | MONA          | suck                       |
| kgweba                 | red and white in small spots | swaana               | whitish                    | SWAA          | pound meat                 |
| maruru                 | cold                         | sokame               | slanted                    | SOKA          | strangle                   |
| namagadi               | female                       | tshwaana             | white                      | TSHWAA        | mark, brand                |
| akaretsa               | include                      | galalela             | shiny                      | GALA          | shout                      |
| rurifatsa              | prove                        | phaphathi            | flat                       | PHAPHA        | be forward                 |
| tseega                 | takeable                     | bogale               | sharp, angry, fierce       | BOGA          | suffer                     |

#### 4. Semantic control set

| <b>Unrelated Prime</b> | <b>English Translation</b> | <b>Related Prime</b> | <b>English Translation</b> | <b>Target</b> | <b>English Translation</b> |
|------------------------|----------------------------|----------------------|----------------------------|---------------|----------------------------|
| kgama                  | strangle                   | betsa                | beat                       | ITAYA         | beat                       |
| botlhoko               | bitter, painful            | pagama               | climb                      | NAMELA        | climb                      |
| tsewa                  | be married                 | lekola               | check                      | TLHOLA        | check                      |
| fepa                   | provide for                | ema                  | wait                       | LETA          | wait                       |
| tsholetsa              | lift                       | robala               | sleep                      | THULAMELA     | fall sleep                 |
| okomela                | peep in                    | akanya               | think                      | GOPOLA        | think                      |
| solofela               | hope, expect               | roga                 | insult                     | TLHAPATSA     | insult                     |
| rora                   | roar                       | fitlha               | hide                       | BIPA          | hide                       |
| mogwe                  | son-in-law                 | kobo                 | blanket                    | LEPAI         | blanket                    |
| noko                   | porcupine                  | borocho              | bread                      | KUKU          | cake                       |
| kotsi                  | accident                   | rre                  | father                     | NTATE         | father                     |

| <b>Unrelated Prime</b> | <b>English Translation</b>              | <b>Related Prime</b> | <b>English Translation</b> | <b>Target</b> | <b>English Translation</b>            |
|------------------------|-----------------------------------------|----------------------|----------------------------|---------------|---------------------------------------|
| rotwe                  | large male monkey                       | mogala               | rope                       | KGOLE         | rope                                  |
| lelapa                 | home, family                            | noka                 | waist                      | LETHEKA       | waist                                 |
| setlhare               | tree                                    | lebati               | door                       | SETSWALO      | curtain or door placed at an entrance |
| letsogo                | arm                                     | buka                 | book                       | LOKWALO       | book                                  |
| ananya                 | exchange                                | alafa                | sure, heal                 | LWALA         | ill                                   |
| makgapha               | shameful                                | fokotsa              | reduce, decrease           | BOTLANA       | small                                 |
| mosi                   | smoke                                   | godisa               | expand, nurture            | TONA          | large, big                            |
| bodule                 | ripe                                    | gotlha               | scrub                      | BORETHE       | smooth                                |
| magwata                | rough                                   | sitwa                | cold                       | TSIDIDI       | cold                                  |
| phatshwa               | black-and-white spotted (animal colour) | nwa                  | drink                      | NYORILWE      | thirsty                               |
| mokoto                 | stew made from different meats          | sefela               | hymn                       | KEREKE        | church                                |
| semela                 | plant                                   | kgwele               | ball                       | LEBALA        | football ground                       |
| mmidi                  | corn                                    | mooki                | nurse                      | LEMAO         | injection                             |
| sekipa                 | t-shirt                                 | tswina               | honey                      | NOTSHE        | bee                                   |
| sekgwa                 | bush                                    | tee                  | tea                        | KOMOKI        | cup                                   |
| ntsi                   | fly                                     | loso                 | death                      | KESI          | coffin                                |
| botlhokwa              | importance                              | koloi                | car                        | LEOKWANE      | fuel                                  |
| moko                   | bone marrow                             | lee                  | egg                        | KOKO          | chicken                               |
| masilo                 | ghost                                   | sekamo               | comb                       | MORIRI        | hair                                  |
